# Supplementary material for: Study of transforming growth factor alpha for the maintenance of human embryonic stem cells
Source: PubMed Central journal article supplement (PMC3480587; doi:10.1007/s00441-012-1476-7), 2012-08-03

Supp. Figure 1

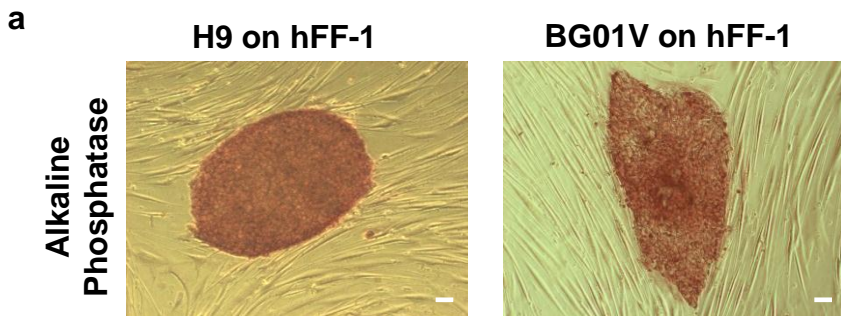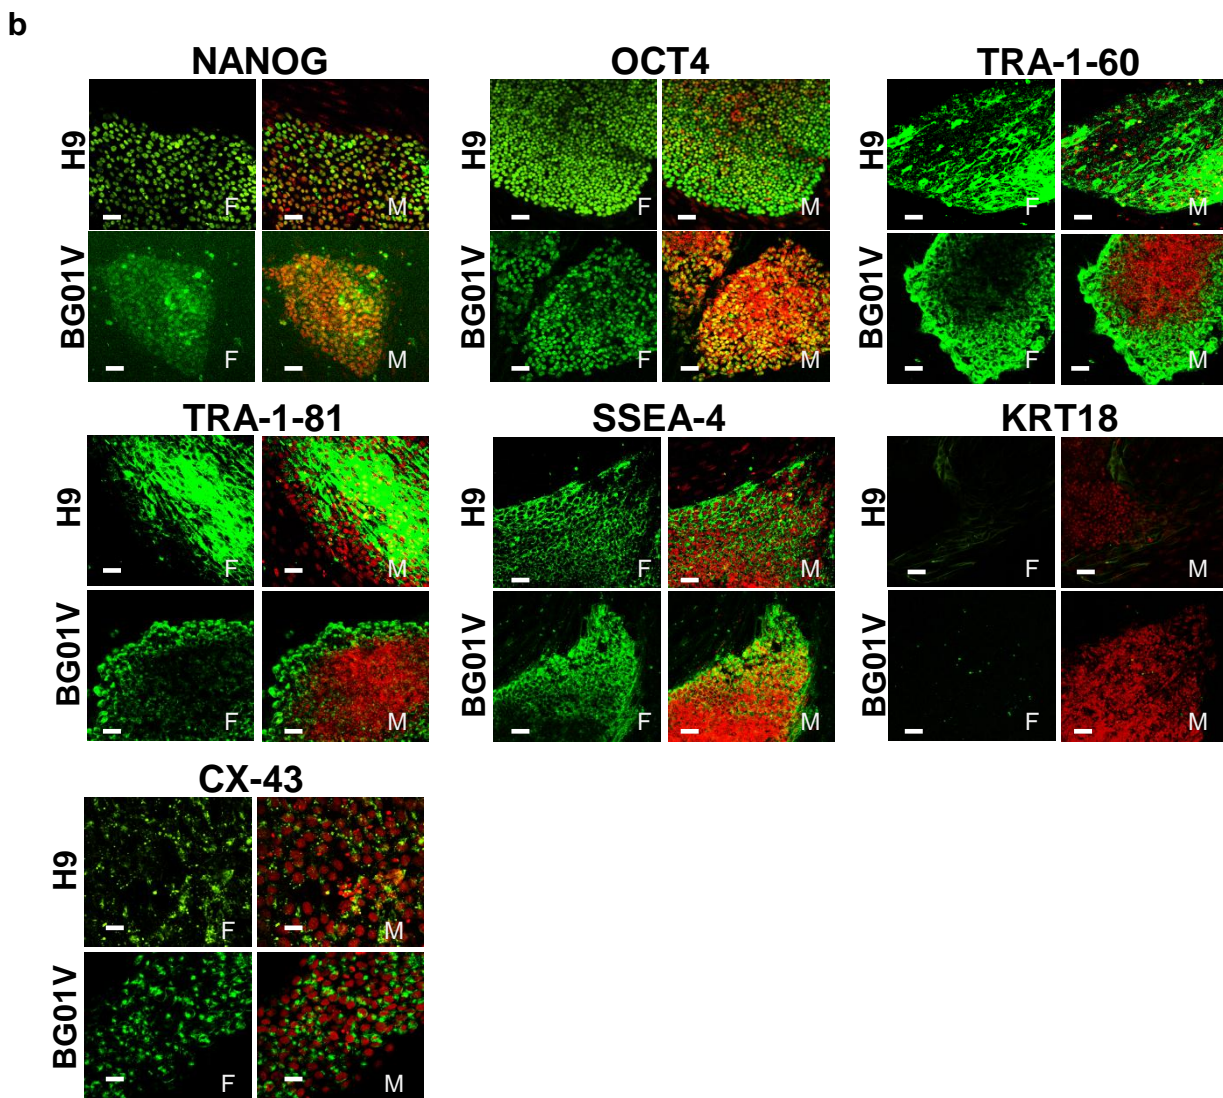

Supp. Figure 1

c

Embryoid Body from H9

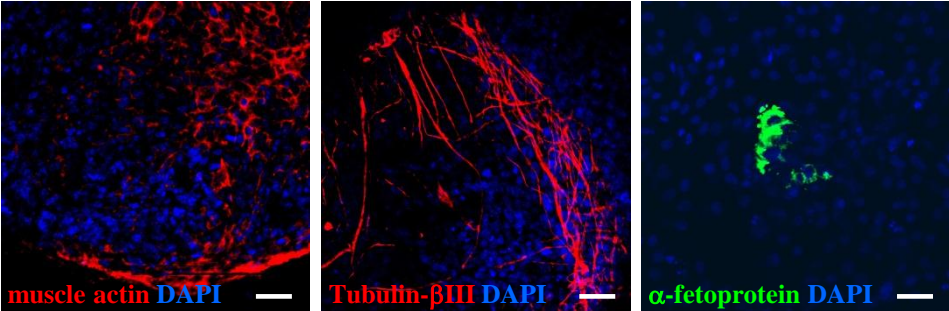

Embryoid Body from BG01V

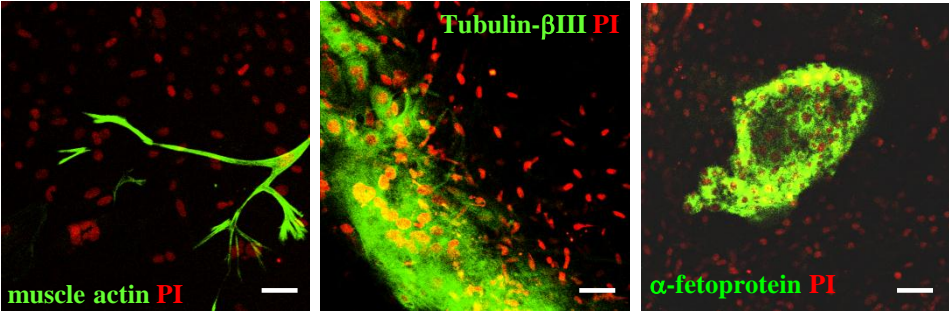

Supp. Figure 2

**Embryoid Body from  
H9 in hFF-1 CM**

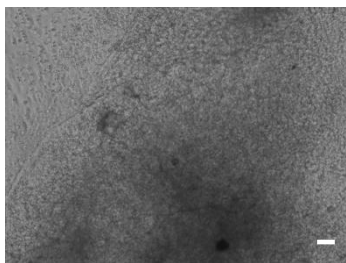

**Embryoid Body from  
H9 in WI-38 CM**

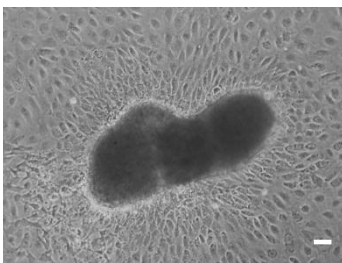

**Embryoid Body from  
H9 in WI-38 CM with  
TGF $\alpha$**

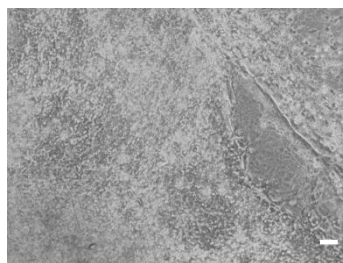

Supplement: 441_2012_1476_MOESM1_ESM.pdf [file 441_2012_1476_MOESM1_ESM.pdf]
